# Supplementary material for: Clinical and Neuroimaging Features in Charcot–Marie–Tooth Patients with GNB4 Mutations
Source: MDPI journal article supplement (doi:10.3390/life11060494), 2021-05-28
Supplement: s1 [file s1]

**Table S1.** Three *GNB4* mutations in the Korean CMT patients.

| Family ID | Phenotype | Mutation   |            | dbSNP accession No. | Mutant Allele Frequency |      |     |        | <i>In silico</i> Analysis |            |         | Note | Reference         |
|-----------|-----------|------------|------------|---------------------|-------------------------|------|-----|--------|---------------------------|------------|---------|------|-------------------|
|           |           | Nucleotide | Amino acid |                     | 1000G                   | ExAC | EVS | KRGDB  | PROVEAN                   | PolyPhen-2 | MUpro   |      |                   |
| FC777     | CMTDIF    | c.G229A    | p.G77R     | rs1553851490        | UR                      | UR   | UR  | UR     | -7.064*                   | 0.999*     | 0.2804  | LP   | This study        |
| FC822     | CMT1      | c.A265G    | p.K89E     | rs387907341         | UR                      | UR   | UR  | UR     | -3.662*                   | 0.996*     | -0.375* | P    | Soong et al. 2013 |
| FC780     | CMT1      |            |            |                     |                         |      |     |        |                           |            |         |      |                   |
| FC787     | Uncertain | c.C530A    | p.T177N    | rs1274879698        | UR                      | UR   | UR  | 0.0006 | -2.337                    | 0.084      | 0.1339  | VUS  | This study        |

\* Pathogenic prediction; 1000G = 1000 Genomes database; ExAC = Exome Aggregation Consortium Browser; EVS = Exome Variant Server; KRGDB = Korean Reference Genome Database; LP = likely pathogenic; P = pathogenic; UR = unreported; VUS = variant of uncertain significance.

**Table S2.** Thigh MRI features in Charcot-Marie-Tooth patients with *GNB4* mutations.

| Patient | Sex | Age at MRI | Level    | Anterior Compartment |                |                    |                  |                 | Medial Compartment |                 |                 | Posterior Compartment |                |                 |                |
|---------|-----|------------|----------|----------------------|----------------|--------------------|------------------|-----------------|--------------------|-----------------|-----------------|-----------------------|----------------|-----------------|----------------|
|         |     |            |          | Sartorius            | Rectus Femoris | Vastus Intermedius | Vastus Lateralis | Vastus Medialis | Adductor Longus    | Adductor Brevis | Adductor Magnus | Gracilis              | Semitendinosus | Semimembranosus | Biceps Femoris |
| FC777   | F   | 27         | Proximal | 1/1                  | 0/0            | 1/1                | 1/1              | 1/1             | 1/1                | 1/1             | 1/1             | 1/1                   | 1/1            | N/A             | N/A            |
|         |     |            | Mid      | 1/1                  | 1/1            | 1/1                | 1/1              | 1/1             | 1/1                | 1/1             | 1/1             | 1/1                   | 1/1            | 1/1             | 1/1            |
|         |     |            | Distal   | 1/1                  | 0/0            | 1/1                | 1/1              | 1/1             | N/A                | N/A             | N/A             | 1/1                   | 1/1            | 1/1             | 1/1            |
|         |     | 32         | Proximal | 1/1                  | 0/0            | 1/1                | 1/1              | 1/1             | 1/1                | 1/1             | 1/1             | 1/1                   | 1/1            | N/A             | N/A            |
|         |     |            | Mid      | 1/1                  | 1/1            | 1/1                | 1/1              | 1/1             | 1/1                | 1/1             | 1/1             | 1/1                   | 1/1            | 1/1             | 1/1            |
|         |     |            | Distal   | 1/1                  | 0/0            | 1/1                | 1/1              | 1/1             | N/A                | N/A             | N/A             | 1/1                   | 1/1            | 1/1             | 1/1            |
| FC822   | M   | 12         | Proximal | 1/1                  | 1/1            | 1/1                | 1/1              | 1/1             | 1/1                | 1/1             | 1/1             | 1/1                   | 1/1            | N/A             | N/A            |
|         |     |            | Mid      | 1/1                  | 1/1            | 1/1                | 1/1              | 1/1             | 1/1                | 1/1             | 1/1             | 2/2                   | 1/2            | 1/1             | 2/2            |
|         |     |            | Distal   | 1/1                  | 1/0            | 1/2                | 2/2              | 1/1             | N/A                | N/A             | N/A             | 1/1                   | 2/2            | 2/2             | 2/2            |
|         |     | 17         | Proximal | 1/1                  | 1/1            | 1/1                | 1/1              | 1/1             | 1/1                | 1/1             | 1/1             | 1/1                   | 1/1            | N/A             | N/A            |
|         |     |            | Mid      | 1/1                  | 1/1            | 1/1                | 1/1              | 1/1             | 1/1                | 1/1             | 1/1             | 2/2                   | 1/2            | 1/1             | 2/2            |
|         |     |            | Distal   | 1/1                  | 1/0            | 1/2                | 2/2              | 1/1             | N/A                | N/A             | N/A             | 1/1                   | 2/2            | 2/2             | 2/2            |
| FC780   | F   | 14         | Proximal | 1/1                  | 1/1            | 1/1                | 1/1              | 1/1             | 1/1                | 1/1             | 1/1             | 1/1                   | 1/1            | N/A             | N/A            |
|         |     |            | Mid      | 1/1                  | 1/1            | 1/1                | 1/1              | 1/1             | 1/1                | 1/1             | 1/1             | 1/1                   | 1/1            | 1/1             | 1/1            |
|         |     |            | Distal   | 1/2                  | 1/1            | 1/1                | 1/1              | 1/1             | N/A                | N/A             | N/A             | 1/1                   | 1/1            | 1/1             | 1/1            |
|         |     | 17         | Proximal | 1/1                  | 1/1            | 1/1                | 1/1              | 1/1             | 1/1                | 1/1             | 1/1             | 1/1                   | 1/1            | N/A             | N/A            |
|         |     |            | Mid      | 1/1                  | 1/1            | 1/1                | 1/1              | 1/1             | 1/1                | 1/1             | 1/1             | 1/1                   | 1/1            | 1/1             | 1/1            |
|         |     |            | Distal   | 1/2                  | 1/1            | 1/1                | 1/2*             | 1/2*            | N/A                | N/A             | N/A             | 1/1                   | 1/1            | 1/1             | 1/1            |

Right/left side. The presence of fatty infiltration based on a five-point semiquantitative scale described by Goutallier et al. : grade 0, normal; grade 1, some fatty streaks; grade 2, less fat than muscle; grade 3, fatty degeneration of 50%; and grade 4, fatty infiltration of more than 50%

Asterisk indicates an interval increase in the Goutallier grade compared to previous MRI findings

**Table S3.** Calf MRI features in Charcot-Marie-Tooth patients with *GNB4* mutations.

| Patient | Sex | Age at MRI | Level    | Anterior compartment |                           |                          | Lateral compartment | Superficial posterior compartment |                       |               | Deep posterior compartment |                    |                         |                        |
|---------|-----|------------|----------|----------------------|---------------------------|--------------------------|---------------------|-----------------------------------|-----------------------|---------------|----------------------------|--------------------|-------------------------|------------------------|
|         |     |            |          | Tibialis anterior    | Extensor digitorum longus | Extensor hallucis longus | Peroneus longus     | Gastrocnemius medial              | Gastrocnemius lateral | Soleus medial | Soleus lateral             | Tibialis posterior | Flexor digitorum longus | Flexor hallucis longus |
| FC777   | F   | 27         | Proximal | 1/1                  | 1/1                       | 1/1                      | 1/1                 | 1/1                               | 0/0                   | 1/1           | 1/0                        | 0/0                | N/A                     | N/A                    |
|         |     |            | Distal   | 0/0                  | 1/1                       | 1/1                      | 1/1                 | N/A                               | N/A                   | 1/1           | 0/0                        | 0/1                | 0/1                     | 0/1                    |
|         |     | 32         | Proximal | 1/1                  | 1/1                       | 1/1                      | 1/1                 | 1/1                               | 0/0                   | 1/1           | 1/0                        | 0/0                | N/A                     | N/A                    |
|         |     |            | Distal   | 0/0                  | 1/1                       | 1/1                      | 1/1                 | N/A                               | N/A                   | 1/1           | 0/0                        | 0/1                | 0/1                     | 0/1                    |
| FC822   | M   | 12         | Proximal | 2/2                  | 1/2                       | N/A                      | 1/1                 | 1/1                               | 1/1                   | 1/1           | 1/1                        | 1/1                | N/A                     | N/A                    |
|         |     |            | Distal   | 2/2                  | 1/1                       | 1/1                      | 2/1                 | N/A                               | N/A                   | 3/3           | 3/3                        | 1/2                | 1/1                     | 1/1                    |
|         |     | 17         | Proximal | 2/2                  | 1/2                       | N/A                      | 1/1                 | 1/1                               | 1/1                   | 1/1           | 1/1                        | 1/1                | N/A                     | N/A                    |
|         |     |            | Distal   | 2/2                  | 1/1                       | 1/1                      | 2/1                 | N/A                               | N/A                   | 3/3           | 3/3                        | 1/2                | 1/1                     | 1/1                    |
| FC780   | F   | 14         | Proximal | 1/1                  | 1/1                       | N/A                      | 2/2                 | 1/1                               | 1/1                   | 1/1           | 1/1                        | 1/1                | N/A                     | N/A                    |
|         |     |            | Distal   | 1/1                  | 1/1                       | 1/1                      | 1/2                 | N/A                               | N/A                   | 1/1           | 1/1                        | 1/1                | 1/1                     | 1/1                    |
|         | F   | 17         | Proximal | 1/1                  | 1/1                       | N/A                      | 2/2                 | 1/1                               | 1/1                   | 1/1           | 1/1                        | 1/1                | N/A                     | N/A                    |
|         |     |            | Distal   | 1/1                  | 1/1                       | 1/1                      | 1/2                 | N/A                               | N/A                   | 1/1           | 1/1                        | 1/1                | 1/1                     | 1/1                    |

Right/left side. The presence of fatty infiltration based on a five-point semiquantitative scale described by Goutallier et al. : grade 0, normal; grade 1, some fatty streaks; grade 2, less fat than muscle; grade 3, fatty degeneration of 50%; grade 4, fatty infiltration of more than 50%.

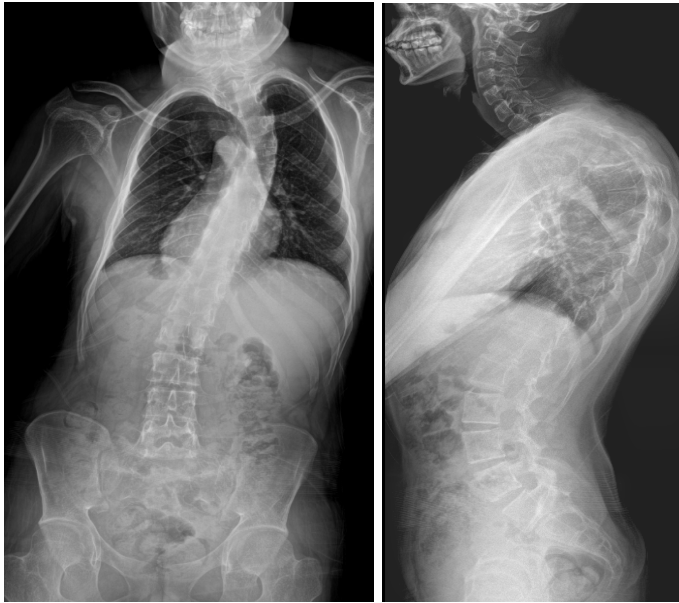

**Figure S1.** Whole spine radiograph of FC822, II-3; Whole spine PA and lateral radiograph shows prominent kyphoscoliosis in the thoracic spine with accentuated lumbar lordosis.
